# Supplementary material
Source: Springer Nature journal article supplement (https://www.springermedizin.de/resource/supplementary/13561_2012_46_MOESM2_ESM.pdf/9687372)
Supplement: MOESM2 [file 9687372]

**Inputs:**

***Health workforce***

- Physicians (doctors)
- Nurses and midwives
- Laboratory technicians
- Beds

***Medicines & supplies***

- Pharmaceutical supplies

***Capital resources***

- Capital inputs (buildings, equipment, vehicles)

**Decision-Making Units**

- Public hospitals

**Outputs:**

- Outpatient patient department visits
- Inpatient department discharges
